# Supplementary material for: Supramolecular NHC ligands: on the influence of ZnII-templates on the activity of RhI(cod) complexes in ‘carbene polymerization’
Source: Royal Society of Chemistry journal article supplement (doi:10.1039/b911339h), 2009-01-01

# Supramolecular NHC ligands: On the influence of $Zn^{II}$ -templates on the activity of $Rh^I(cod)$ complexes in ‘Carbene Polymerization’

Miguel Rubio,<sup>a</sup> Erica Jellema,<sup>a</sup> Maxime A. Siegler,<sup>b</sup> Anthony L. Spek,<sup>b</sup> Joost N. H. Reek<sup>\*a</sup> and Bas de Bruin<sup>\*a</sup>

<sup>a</sup> Van't Hoff Institute for Molecular Sciences, University of Amsterdam, Nieuwe Achtergracht 166, 1018WV, Amsterdam (The Netherlands). Fax: +31 20 525 5604/6495; Tel: +31 20 5255265; E-mail: J.N.H.Reek@uva.nl / B.deBruin@uva.nl

<sup>b</sup> Bijvoet Center for Biomolecular Research, Utrecht (The Netherlands). Fax: +31 30 2533940; Tel: +31 30 2532538; E-mail: a.l.spek@uu.nl

## Supporting Information

### Binding constant determinations by UV/Vis titrations:

#### 4b·(I)

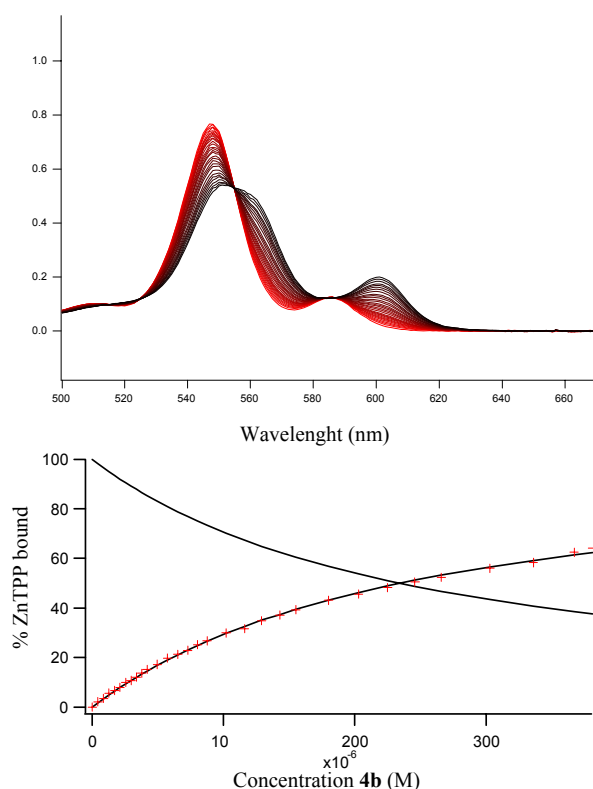

Figure S1. Electronic absorption spectra recorded during titration of  $Zn^{II}$ -TPP by complex **4b** in dichloromethane (top). Percentage bonded and free  $Zn^{II}$ -TPP (at 563 nm) vs **4b** concentration (bottom).  $K_{ass} = 4.6 \times 10^3 M^{-1}$ .

### 4b•(II)

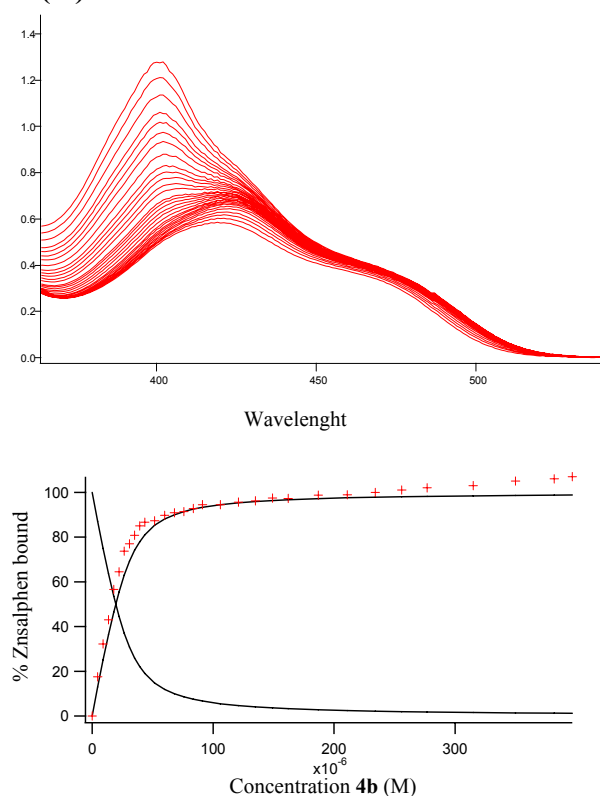

Figure S2. Electronic absorption spectra recorded during titration of Zn<sup>II</sup>-salphen by complex **4b** in dichloromethane (top). Percentage bonded and free Zn<sup>II</sup>-salphen (at 460 nm) vs **4b** concentration (bottom).  $K_{\text{ass}} = 3.0 \times 10^5 \text{ M}^{-1}$ .

### ESI-MS

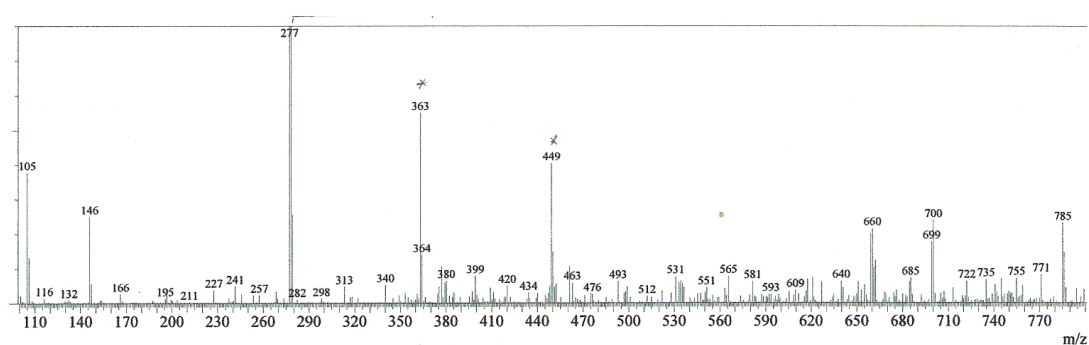

Supplement: b911339h.pdf [file b911339h.pdf]
